# Supplementary material for: Increased chest CT derived bone and muscle measures capture markers of improved morbidity and mortality in COPD
Source: Springer Nature journal article supplement (doi:10.1186/s12931-022-02237-w), 2022-11-15
Supplement: MOESM1 [file 12931_2022_2237_MOESM1_ESM.pdf]

**A**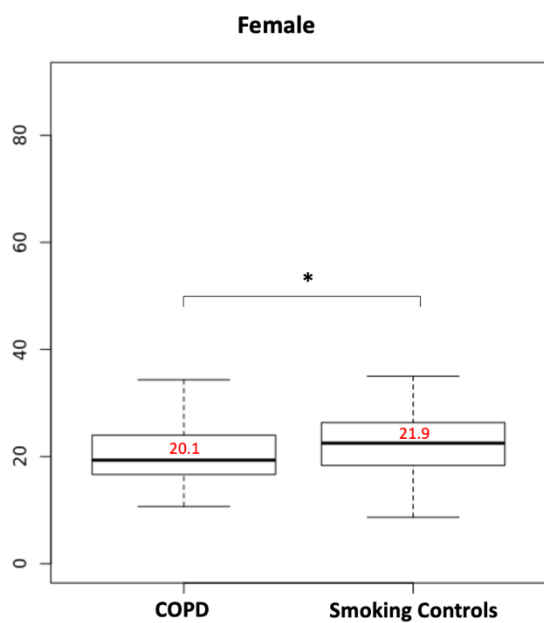**B**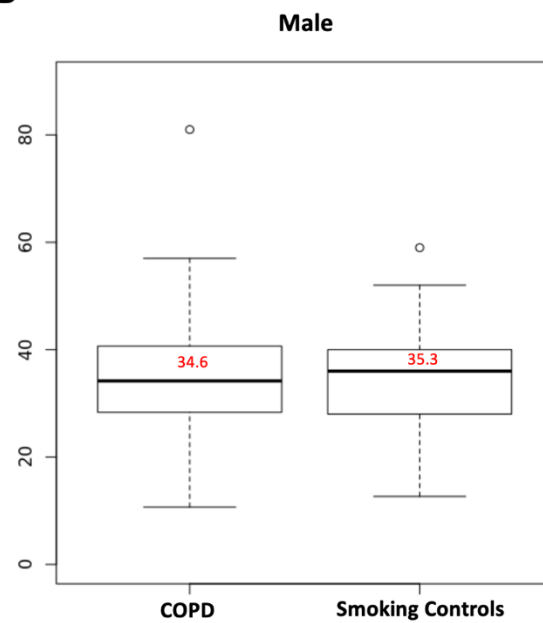

**Figure S1.** Sex-stratified Clinical and Functional Measures in **(A)** Females and **(B)** Males with handgrip strength data. Values in red correspond to mean handgrip strength. \* Corresponds to a statistically significant ( $p < 0.05$ ) difference between participants with COPD and smoking controls.
